# Supplementary material for: Effects of COVID-19 Non-Pharmacological Interventions on Dengue Infection: A Systematic Review and Meta-Analysis
Source: PubMed Central journal article supplement (PMC9162155; doi:10.3389/fcimb.2022.892508), 2022-05-19
Supplement: DataSheet_2.pdf [file DataSheet_2.pdf]

A.

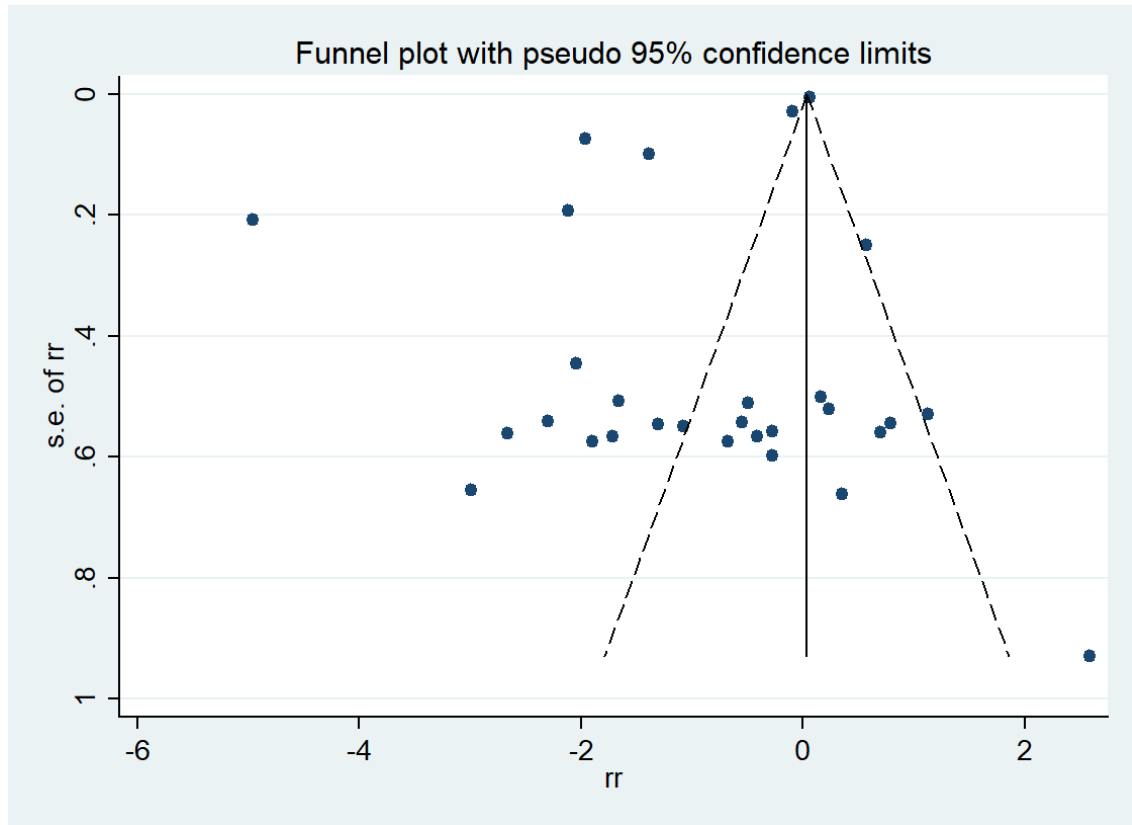

B.

Begg's Test

```

adj. Kendall's Score (P-Q) =      78
Std. Dev. of Score =      53.31
Number of Studies =         29
      z =         1.46
Pr > |z| =         0.143
      z =         1.44 (continuity corrected)
Pr > |z| =         0.149 (continuity corrected)
  
```

Egger's test

| Std_Eff | Coef.     | Std. Err. | t     | P> t  | [95% Conf. Interval] |           |
|---------|-----------|-----------|-------|-------|----------------------|-----------|
| slope   | .0654052  | .0360586  | 1.81  | 0.081 | -.008581             | .1393914  |
| bias    | -3.923013 | 1.416651  | -2.77 | 0.010 | -6.829742            | -1.016285 |

Supplementary Figure 2. Publication of bias test results. A. Funnel plot. B. Begg's Test and Egger's test.
