# Supplementary material for: Effects of COVID-19 Non-Pharmacological Interventions on Dengue Infection: A Systematic Review and Meta-Analysis
Source: PubMed Central journal article supplement (PMC9162155; doi:10.3389/fcimb.2022.892508), 2022-05-19
Supplement: DataSheet_3.pdf [file DataSheet_3.pdf]

A.

| Quality assessment             |                       |                      |                      |                         |                        |                                                                                        | No of patients |    | Effect                 |          | Quality          | Importance |
|--------------------------------|-----------------------|----------------------|----------------------|-------------------------|------------------------|----------------------------------------------------------------------------------------|----------------|----|------------------------|----------|------------------|------------|
| No of studies                  | Design                | Risk of bias         | Inconsistency        | Indirectness            | Imprecision            | Other considerations                                                                   |                |    | Relative (95% CI)      | Absolute |                  |            |
| RR (follow-up median 6 months) |                       |                      |                      |                         |                        |                                                                                        |                |    |                        |          |                  |            |
| 9                              | observational studies | serious <sup>1</sup> | serious <sup>1</sup> | no serious indirectness | no serious imprecision | reporting bias strong association <sup>1</sup> increased effect for RR ~1 <sup>1</sup> | -              | -  | RR 0.39 (0.28 to 0.55) | -        | ⊖⊖⊖⊖<br>VERY LOW | IMPORTANT  |
|                                |                       |                      |                      |                         |                        |                                                                                        |                | 0% |                        | -        |                  |            |

B.

| Quality assessment                     |                       |                         |                      |                         |                        |                                                                         | No of patients |    | Effect                 |          | Quality          | Importance |
|----------------------------------------|-----------------------|-------------------------|----------------------|-------------------------|------------------------|-------------------------------------------------------------------------|----------------|----|------------------------|----------|------------------|------------|
| No of studies                          | Design                | Risk of bias            | Inconsistency        | Indirectness            | Imprecision            | Other considerations                                                    | NPIs           |    | Relative (95% CI)      | Absolute |                  |            |
| Relative Risk (follow-up mean 1 years) |                       |                         |                      |                         |                        |                                                                         |                |    |                        |          |                  |            |
| 29                                     | observational studies | no serious risk of bias | serious <sup>1</sup> | no serious indirectness | no serious imprecision | strong association <sup>1</sup> increased effect for RR ~1 <sup>1</sup> | -              | -  | RR 0.39 (0.28 to 0.55) | -        | ⊖⊖⊖⊖<br>MODERATE | CRITICAL   |
|                                        |                       |                         |                      |                         |                        |                                                                         |                | 0% |                        | -        |                  |            |

<sup>1</sup> No explanation was provided

\*The basis for the **assumed risk** (e.g. the median control group risk across studies) is provided in footnotes. The **corresponding risk** (and its 95% confidence interval) is based on the assumed risk in the comparison group and the **relative effect** of the intervention (and its 95% CI).

CI: Confidence interval; RR: Risk ratio;

GRADE Working Group grades of evidence

**High quality:** Further research is very unlikely to change our confidence in the estimate of effect.

**Moderate quality:** Further research is likely to have an important impact on our confidence in the estimate of effect and may change the estimate.

**Low quality:** Further research is very likely to have an important impact on our confidence in the estimate of effect and is likely to change the estimate.

**Very low quality:** We are very uncertain about the estimate.

Supplementary Figure 3. The GRADE assessment for evidence. A and B correspond to different statistical analysis groupings described above.
